# Supplementary material for: Association of Lowering Low‐Density Lipoprotein Cholesterol With Contemporary Lipid‐Lowering Therapies and Risk of Diabetes Mellitus: A Systematic Review and Meta‐Analysis
Source: PubMed Central journal article supplement — J Am Heart Assoc. 2019 Mar 22;8(7):e011581. doi: 10.1161/JAHA.118.011581 (PMC6509736; doi:10.1161/jaha.118.011581), 2019-03-22
Supplement: JAH3-8-e011581-s001.pdf [file JAH3-8-e011581-s001.pdf]

# **SUPPLEMENTAL MATERIAL**

**Table S1. Search strategy.**

---

|               |                                                                                                                                                                                                                                                                                                                                                                                                                                                                                                                                                                                                                                                                                                                                                                                                                                                                                                                                                                                                                                                                                                                                                                                                                                                                                                                                                                                                                                                                                                                                                                                             |
|---------------|---------------------------------------------------------------------------------------------------------------------------------------------------------------------------------------------------------------------------------------------------------------------------------------------------------------------------------------------------------------------------------------------------------------------------------------------------------------------------------------------------------------------------------------------------------------------------------------------------------------------------------------------------------------------------------------------------------------------------------------------------------------------------------------------------------------------------------------------------------------------------------------------------------------------------------------------------------------------------------------------------------------------------------------------------------------------------------------------------------------------------------------------------------------------------------------------------------------------------------------------------------------------------------------------------------------------------------------------------------------------------------------------------------------------------------------------------------------------------------------------------------------------------------------------------------------------------------------------|
| Search String | ("hydroxymethylglutaryl-coa reductase inhibitors"[Pharmacological Action] OR "hydroxymethylglutaryl-coa reductase inhibitors"[MeSH Terms] OR ("hydroxymethylglutaryl-coa"[All Fields] AND "reductase"[All Fields] AND "inhibitors"[All Fields]) OR "hydroxymethylglutaryl-coa reductase inhibitors"[All Fields] OR "statins"[All Fields]) OR (("proprotein convertases"[MeSH Terms] OR ("proprotein"[All Fields] AND "convertases"[All Fields]) OR "proprotein convertases"[All Fields] OR ("proprotein"[All Fields] AND "convertase"[All Fields]) OR "proprotein convertase"[All Fields]) AND subtilisin/kexin[All Fields] AND type[All Fields] AND 9[All Fields] AND ("antagonists and inhibitors"[Subheading] OR ("antagonists"[All Fields] AND "inhibitors"[All Fields]) OR "antagonists and inhibitors"[All Fields] OR "inhibitors"[All Fields])) OR (pcsk[All Fields] AND 9[All Fields] AND ("antagonists and inhibitors"[Subheading] OR ("antagonists"[All Fields] AND "inhibitors"[All Fields]) OR "antagonists and inhibitors"[All Fields] OR "inhibitors"[All Fields])) OR ("ezetimibe"[MeSH Terms] OR "ezetimibe"[All Fields]) AND ("cholesterol, ldl"[MeSH Terms] OR ("cholesterol"[All Fields] AND "ldl"[All Fields]) OR "ldl cholesterol"[All Fields] OR ("low"[All Fields] AND "density"[All Fields] AND "lipoprotein"[All Fields] AND "cholesterol"[All Fields]) OR "low density lipoprotein cholesterol"[All Fields]) OR ldl-c[All Fields] AND ("diabetes mellitus"[MeSH Terms] OR ("diabetes"[All Fields] AND "mellitus"[All Fields]) OR "diabetes mellitus"[All Fields]) |
|---------------|---------------------------------------------------------------------------------------------------------------------------------------------------------------------------------------------------------------------------------------------------------------------------------------------------------------------------------------------------------------------------------------------------------------------------------------------------------------------------------------------------------------------------------------------------------------------------------------------------------------------------------------------------------------------------------------------------------------------------------------------------------------------------------------------------------------------------------------------------------------------------------------------------------------------------------------------------------------------------------------------------------------------------------------------------------------------------------------------------------------------------------------------------------------------------------------------------------------------------------------------------------------------------------------------------------------------------------------------------------------------------------------------------------------------------------------------------------------------------------------------------------------------------------------------------------------------------------------------|

---

**Table S2. Cochrane Quality risk assessment.**

| <b>Studies</b>                     | <b>Randomization</b> | <b>Allocation concealment</b> | <b>Blinding (Physician/Patient)</b> | <b>Adjudication of outcomes</b> | <b>Selective outcome reporting</b> | <b>Incomplete data reporting addressed?</b> | <b>Free of other bias?</b> |
|------------------------------------|----------------------|-------------------------------|-------------------------------------|---------------------------------|------------------------------------|---------------------------------------------|----------------------------|
| <b>Statins</b>                     |                      |                               |                                     |                                 |                                    |                                             |                            |
| PMSGCRP (1993) <sup>1</sup>        | Low risk             | Moderate risk                 | Low risk                            | Moderate risk                   | Low risk                           | Low risk                                    | Low risk                   |
| 4S (1994) <sup>2</sup>             | Low risk             | Moderate risk                 | Low risk                            | Low risk                        | Low risk                           | Low risk                                    | Low risk                   |
| WOSCOP (1995) <sup>3</sup>         | Low risk             | Moderate risk                 | Low risk                            | Low risk                        | Low risk                           | Low risk                                    | Low risk                   |
| LIPID (1998) <sup>4</sup>          | Low risk             | Moderate risk                 | Low risk                            | Low risk                        | Low risk                           | Low risk                                    | Low risk                   |
| AFCAPS/TexCAPS (1998) <sup>5</sup> | Low risk             | Moderate risk                 | Low risk                            | Low risk                        | Low risk                           | Low risk                                    | Low risk                   |
| GISSI PREV (2000) <sup>6</sup>     | Moderate risk        | Moderate risk                 | High risk                           | Moderate risk                   | Low risk                           | Moderate risk                               | Moderate risk              |
| ALLHAT-LLT (2002) <sup>7</sup>     | Low risk             | Low risk                      | High risk                           | Low risk                        | Low risk                           | Moderate risk                               | Moderate risk              |
| GREACE (2002) <sup>8</sup>         | Low risk             | Moderate risk                 | High risk                           | Low risk                        | Low risk                           | Low risk                                    | Low risk                   |
| PROSPER (2002) <sup>9</sup>        | Low risk             | Low risk                      | Low risk                            | Low risk                        | Low risk                           | Moderate risk                               | Low risk                   |
| HPS (2003) <sup>10</sup>           | Low risk             | Moderate risk                 | Low risk                            | Low risk                        | High risk                          | Low risk                                    | Moderate risk              |
| ASCOT-LLA (2003) <sup>11</sup>     | Low risk             | Moderate risk                 | Low risk                            | Moderate risk                   | Low risk                           | Low risk                                    | Moderate risk              |
| A to Z (2004) <sup>12</sup>        | Low risk             | Moderate risk                 | Low risk                            | Low risk                        | Low risk                           | Low risk                                    | Low risk                   |
| PROVE IT (2004) <sup>13</sup>      | Low risk             | Moderate risk                 | Low risk                            | Low risk                        | Low risk                           | Low risk                                    | Low risk                   |
| IDEAL (2005) <sup>14</sup>         | Moderate risk        | Low risk                      | High risk                           | Low risk                        | Low risk                           | Low risk                                    | Moderate risk              |



|                                       |          |          |          |          |          |               |          |
|---------------------------------------|----------|----------|----------|----------|----------|---------------|----------|
| FOURIER (2017) <sup>31</sup>          | Low risk      | Low risk |
| ODYSSEY OUTCOMES (2018) <sup>32</sup> | Low risk | Moderate risk | Low risk |

**Table S3. Baseline characteristics of the entire study population for each trial.**

| <b>Studies (Year)</b>              | <b>N</b> | <b>Groups</b>        | <b>Age (years)</b> | <b>Men (%)</b> | <b>Coronary heart disease (%)</b> | <b>Hypertension (%)</b> | <b>Smoking (%)</b> |
|------------------------------------|----------|----------------------|--------------------|----------------|-----------------------------------|-------------------------|--------------------|
| PMSGCRP (1993) <sup>1</sup>        | 1,062    | Pravastatin 20 mg    | 55                 | 77             | 32                                | 47                      | 28                 |
|                                    |          | Placebo              | 55                 | 76             | 36                                | 48                      | 30                 |
| 4S (1994) <sup>2</sup>             | 4,444    | Simvastatin 20-40 mg | 58.6               | 82             | 100                               | 26                      | 24                 |
|                                    |          | Placebo              | 58.6               | 81             | 100                               | 26                      | 27                 |
| WOSCOPS (1995) <sup>3</sup>        | 6,595    | Pravastatin 40 mg    | 55.3               | 100            | 0.0                               | 16                      | 44                 |
|                                    |          | Placebo              | 55.1               | 100            | 0.0                               | 15                      | 44                 |
| LIPID (1998) <sup>4</sup>          | 9,014    | Pravastatin 40 mg    | 62                 | 83             | 100                               | 41                      | 9                  |
|                                    |          | Placebo              | 62                 | 83             | 100                               | 42                      | 10                 |
| AFCAPS/TexCAPS (1998) <sup>5</sup> | 6,605    | Lovastatin 20-40 mg  | 58                 | 85             | 0.0                               | 22                      | 13                 |
|                                    |          | Placebo              | 58                 | 85             | 0.0                               | 22                      | 12                 |
| GISSI PREV (2000) <sup>6</sup>     | 3,460    | Pravastatin 20 mg    | 59.3               | 86.3           | —                                 | 36.5                    | 11.8               |
|                                    |          | Usual care           |                    |                |                                   |                         |                    |
| ALLHAT-LLT (2002) <sup>7</sup>     | 10,355   | Pravastatin 40 mg    | 66.4               | 51.4           | 13.4                              | 89.8                    | 23.1               |
|                                    |          | Usual care           | 66.3               | 51.0           | 15.0                              | 89.9                    | 23.3               |
| GREACE (2002) <sup>8</sup>         | 1,600    | Atorvastatin 80 mg   | 58                 | 78             | 100                               | 42                      | NR                 |

|                                |        |                      |      |      |      |      |      |
|--------------------------------|--------|----------------------|------|------|------|------|------|
|                                |        | Usual care           | 59   | 79   | 100  | 44   | NR   |
| PROSPER (2002) <sup>9</sup>    | 5,804  | Pravastatin 40 mg    | 75.4 | 48.3 | 45.2 | 62.2 | 26.0 |
|                                |        | Placebo              | 75.3 | 48.3 | 43.2 | 61.6 | 27.6 |
| HPS (2003) <sup>10</sup>       | 20,536 | Simvastatin 40 mg    | 87   | 86   | 87   | —    | —    |
|                                |        | Placebo              | 23   | 18   | 22   | —    | —    |
| ASCOT-LLA (2003) <sup>11</sup> | 10,342 | Atorvastatin 10 mg   | 63.1 | 81.1 | 0.0  | —    | 33.2 |
|                                |        | Placebo              | 63.2 | 81.3 | 0.0  | —    | 32.2 |
| A to Z (2004) <sup>12</sup>    | 4,497  | Simvastatin 20mg     | 61   | 75   | 16   | 50   | 41   |
|                                |        | Simvastatin 40/80 mg | 61   | 76   | 18   | 50   | 41   |
| PROVE IT (2004) <sup>13</sup>  | 4,162  | Pravastatin 40 mg    | 58.3 | 78.4 | 100  | 49.2 | 37.1 |
|                                |        | Atorvastatin 80 mg   | 58.1 | 77.8 | 100  | 51.3 | 36.4 |
| IDEAL (2005) <sup>14</sup>     | 8,888  | Simvastatin 20 mg    | 61.6 | 80.8 | 100  | 33.0 | 21.2 |
|                                |        | Atorvastatin 80 mg   | 61.8 | 80.9 | 100  | 32.9 | 20.1 |
| TNT (2005) <sup>15</sup>       | 10,001 | Atorvastatin 80 mg   | 61.2 | 81.2 | 100  | 53.9 | 13.4 |
|                                |        | Atorvastatin 10 mg   | 60.9 | 80.8 | 100  | 54.4 | 13.4 |
| MEGA (2006) <sup>16</sup>      | 7,832  | Pravastatin 10-20 mg | 58.2 | 32   | 0.0  | 42   | 21   |
|                                |        | Usual care           | 58.4 | 31   | 0.0  | 42   | 20   |

|                                              |        |                                       |        |      |      |      |      |
|----------------------------------------------|--------|---------------------------------------|--------|------|------|------|------|
| CORONA (2007) <sup>17</sup>                  | 5,011  | Rosuvastatin 10 mg                    | 73     | 76   | 100  | 63   | 9    |
|                                              |        | Placebo                               | 73     | 76   | 100  | 63   | 8    |
| GISSI-HF (2008) <sup>18</sup>                | 4,631  | Rosuvastatin 10 mg                    | 68     | 76.2 | 31.8 | 55.1 | 14.1 |
|                                              |        | Placebo                               | 68     | 78.6 | 33.8 | 53.5 | 14.0 |
| JUPITER (2008) <sup>19</sup>                 | 17,802 | Rosuvastatin 20 mg                    | 66     | 5474 | 0.0  | —    | —    |
|                                              |        | Placebo                               | 66     | 5527 | 0.0  | —    | —    |
| ASTRONOMER<br>(2010) <sup>20</sup>           | 269    | Rosuvastatin 40 mg                    | 58.0   | 60.5 | 0.0  | —    | 11.2 |
|                                              |        | Placebo                               | 57.9   | 63.0 | 0.0  | —    | 10.4 |
| SEARCH (2010) <sup>21</sup>                  | 12,064 | Simvastatin 80 mg                     | 64 (9) | 83   | 100  | 42   | 30   |
|                                              |        | Simvastatin 20 mg                     |        |      |      |      |      |
| ODYSSEY<br>OPTIONS I<br>(2015) <sup>22</sup> | 355    | Alirocumab 75/150 mg<br>every 2 weeks | 63.1   | 61.5 | 52.9 | 76.9 | —    |
|                                              |        | Ezetimibe                             | 62.8   | 66.5 | 57.8 | 78.9 | —    |
| ODYSSEY FH I<br>(2015) <sup>23</sup>         | 486    | Alirocumab 75 mg every 2<br>weeks     | 52.1   | 180  | 147  | 139  | 39   |
|                                              |        | Placebo                               | 51.7   | 94   | 78   | 71   | 30   |
| ODYSSEY FH II<br>(2015) <sup>23</sup>        | 249    | Alirocumab 75 mg every 2<br>weeks     | 53.2   | 86   | 58   | 57   | 36   |



|                                        |       |                                                   |      |      |      |      |     |
|----------------------------------------|-------|---------------------------------------------------|------|------|------|------|-----|
|                                        |       | Placebo                                           | 53.2 | 45   | 31   | 24   | 13  |
| ODYSSEY LONG TERM (2015) <sup>24</sup> | 2,341 | Alirocumab 150 mg every 2 weeks                   | 60.4 | 983  | 1055 | —    | 325 |
|                                        |       | Placebo                                           | 60.6 | 474  | 552  | —    | 159 |
| OSLER (2015) <sup>25</sup>             | 4,465 | Evolocumab 140 mg every 2 weeks or 420 mg monthly | 57.8 | 1490 | 589  | 1545 | 465 |
|                                        |       | Placebo                                           | 58.2 | 765  | 307  | 777  | 222 |
| GLAGOV (2016) <sup>26</sup>            | 968   | Evolocumab 420 mg monthly                         | 59.8 | 349  | 484  | 398  | 124 |
|                                        |       | Placebo                                           | 59.8 | 350  | 484  | 405  | 113 |
| ODYSSEY CHOICE I (2016) <sup>27</sup>  | 803   | Alirocumab 300 mg monthly or 75 mg every 2 weeks  | 59.2 | 80   | 40   | —    | —   |
|                                        |       | Placebo                                           | 59.4 | 40   | 20   | —    | —   |
| ODYSSEY JAPAN (2016) <sup>28</sup>     | 206   | Alirocumab 150 mg every 2 weeks                   | 60.3 | 84   | 18   | —    | —   |
|                                        |       | Placebo                                           | 61.8 | 47   | 8    | —    | —   |
| YUKAWA-2 (2016) <sup>29</sup>          | 404   | Evolocumab 140 mg every 2 weeks or 420 mg monthly | 62.0 | 60   | 15   | 75   | 23  |
|                                        |       | Placebo                                           | 61.0 | 61   | 11   | 72   | 26  |

|                                               |        |                                                   |      |      |      |      |      |
|-----------------------------------------------|--------|---------------------------------------------------|------|------|------|------|------|
| ODYSSEY<br>OPTIONS II<br>(2016) <sup>30</sup> | 305    | Alirocumab 75 mg every 2 weeks                    | 59.9 | 57   | 53   | 74   | —    |
|                                               |        | Usual care                                        | 61.3 | 63   | 60   | 72   | —    |
| FOURIER (2017) <sup>31</sup>                  | 27,564 | Evolocumab 140 mg every 2 weeks or 420 mg monthly | 62.5 | 75.4 | 80.9 | 80.1 | 28.0 |
|                                               |        | Placebo                                           | 62.5 | 75.5 | 81.3 | 80.1 | 28.5 |
| ODYSSEY<br>OUTCOMES<br>(2018) <sup>32</sup>   | 18,924 | Alirocumab 75-150 mg every 2 weeks                | 58.5 | 74.7 | 100  | 65.6 | 24.1 |
|                                               |        | Placebo                                           | 58.6 | 74.9 | 100  | 63.9 | 24.1 |

**Table S4. Analyses According to Fixed Effects Model.**

| <b>Analysis</b>                                                                                                               | <b>Studies</b> | <b>Patients</b> | <b>RR [95% CI]</b> | <b>P-interaction</b> |
|-------------------------------------------------------------------------------------------------------------------------------|----------------|-----------------|--------------------|----------------------|
| <b>Risk of Incident DM in Total Population</b>                                                                                |                |                 |                    |                      |
| More intensive lipid lowering therapy                                                                                         | 33             | 163,688         | 1.07 [1.03, 1.11]  | 0.02                 |
| Statins                                                                                                                       | 21             | 124,755         | 1.10 [1.05, 1.15]  |                      |
| PCSK9 Inhibitors                                                                                                              | 12             | 38,933          | 1.00 [0.93, 1.07]  |                      |
| <b>Subgroup Analysis According to Weighted Between-Group Difference in LDL-C Achieved</b>                                     |                |                 |                    |                      |
| 0.51 mmol/L                                                                                                                   | 5              | 32,752          | 1.11 [1.03, 1.19]  | 0.08                 |
| 1.15 mmol/L                                                                                                                   | 16             | 92,003          | 1.09 [1.03, 1.16]  |                      |
| 1.58 mmol/L                                                                                                                   | 12             | 38,933          | 1.00 [0.93, 1.07]  |                      |
| <b>Sensitivity Analysis According to Statins Subgroups</b>                                                                    |                |                 |                    |                      |
| High intensity statin versus low intensity statin                                                                             | 5              | 32,752          | 1.11 [1.03, 1.19]  | 0.72                 |
| Statin vs no statin                                                                                                           | 16             | 92,003          | 1.09 [1.03, 1.16]  |                      |
| <b>Trials with sample size of <math>\geq 500</math> patients which reported outcome at follow-up <math>\geq 1</math> year</b> |                |                 |                    |                      |
| More intensive lipid lowering therapy                                                                                         | 25             | 161,531         | 1.07 [1.03, 1.11]  | 0.03                 |
| Statins                                                                                                                       | 20             | 124,486         | 1.10 [1.05, 1.15]  |                      |
| PCSK9 Inhibitors                                                                                                              | 5              | 37,045          | 1.00 [0.93, 1.08]  |                      |

\*P-interaction corresponds to statin and PCSK9 inhibitor subgroup interaction

**Table S5. Sensitivity Analyses According to Year of Publication and Definition of Diabetes Mellitus.**

|                                                                                  | Studies | Patients | Risk Ratio [95% CI]                   |                   |                   | *P interaction |
|----------------------------------------------------------------------------------|---------|----------|---------------------------------------|-------------------|-------------------|----------------|
|                                                                                  |         |          | More intensive lipid lowering therapy | Statin            | PCSK9 Inhibitor   |                |
| <b>Cumulative Meta-Analysis Accounting for the Year of the Trial Publication</b> |         |          |                                       |                   |                   |                |
| Original meta-analysis                                                           | 33      | 163,688  | 1.07 [1.03, 1.11]                     | 1.10 [1.05, 1.15] | 1.00 [0.93, 1.07] | 0.02           |
| 4S and WOSCOPS excluded                                                          | 31      | 153,472  | 1.08 [1.04, 1.12]                     | 1.11 [1.06, 1.17] | 1.00 [0.93, 1.07] | 0.01           |
| Year before 2000 excluded                                                        | 28      | 139,202  | 1.08 [1.04, 1.13]                     | 1.13 [1.07, 1.18] | 1.00 [0.93, 1.07] | 0.006          |
| Year before 2010 excluded                                                        | 14      | 49,999   | 1.02 [0.96, 1.08]                     | 1.07 [0.96, 1.19] | 1.00 [0.93, 1.07] | 0.31           |
| <b>Meta-Analysis Stratified According to Definition of Diabetes Mellitus</b>     |         |          |                                       |                   |                   |                |
| Two FBG levels $\geq$ 126 mg/dL                                                  | 11      | 89,303   | 1.10 [1.04, 1.16]                     | 1.11 [1.05, 1.18] | 1.05 [0.95, 1.17] | 0.37           |
| Medication/Adverse events                                                        | 14      | 45,625   | 1.07 [0.97, 1.18]                     | 1.08 [0.98, 1.19] | 0.96 [0.61, 1.51] | 0.62           |
| Adverse events only                                                              | 8       | 28,760   | 1.00 [0.92, 1.08]                     | 1.08 [0.95, 1.23] | 0.95 [0.86, 1.05] | 0.12           |

\*P-interaction corresponds to statin and PCSK9 inhibitor subgroup interaction. FBG (Fasting Blood Glucose)

**Figure S1. Funnel plot for publication bias assessment.**

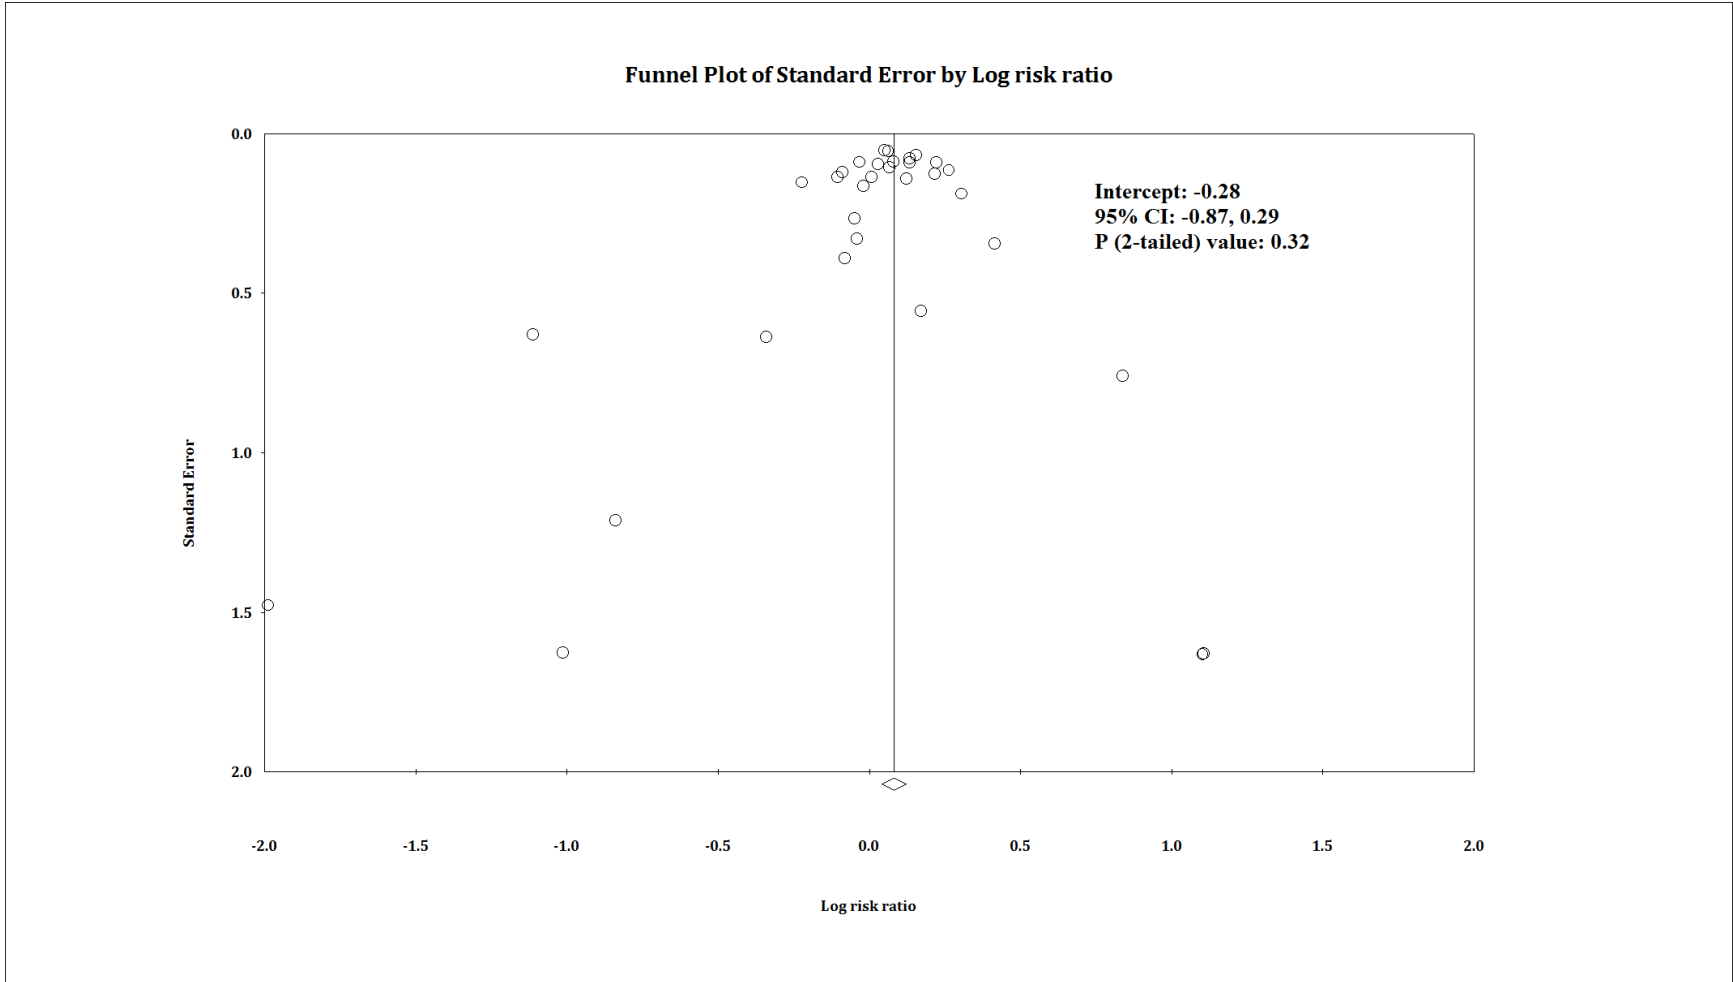

## Supplemental References:

1. Effects of pravastatin in patients with serum total cholesterol levels from 5.2 to 7.8 mmol/liter (200 to 300 mg/dl) plus two additional atherosclerotic risk factors. The pravastatin multinational study group for cardiac risk patients. *The American journal of cardiology*. 1993;72:1031-1037
2. Randomised trial of cholesterol lowering in 4444 patients with coronary heart disease: The scandinavian simvastatin survival study (4s). *Lancet (London, England)*. 1994;344:1383-1389
3. Shepherd J, Cobbe SM, Ford I, Isles CG, Lorimer AR, MacFarlane PW, McKillop JH, Packard CJ. Prevention of coronary heart disease with pravastatin in men with hypercholesterolemia. West of scotland coronary prevention study group. *The New England journal of medicine*. 1995;333:1301-1307
4. Group TL-TIwPiIDS. Prevention of cardiovascular events and death with pravastatin in patients with coronary heart disease and a broad range of initial cholesterol levels. *New England Journal of Medicine*. 1998;339:1349-1357
5. Downs JR, Clearfield M, Weis S, Whitney E, Shapiro DR, Beere PA, Langendorfer A, Stein EA, Kruyer W, Gotto AM, Jr. Primary prevention of acute coronary events with lovastatin in men and women with average cholesterol levels: Results of afcaps/texcaps. Air force/texas coronary atherosclerosis prevention study. *Jama*. 1998;279:1615-1622
6. Results of the low-dose (20 mg) pravastatin gissi prevenzione trial in 4271 patients with recent myocardial infarction: Do stopped trials contribute to overall knowledge? Gissi prevenzione investigators (gruppo italiano per lo studio della sopravvivenza nell'infarto miocardico). *Italian heart journal : official journal of the Italian Federation of Cardiology*. 2000;1:810-820
7. Major outcomes in moderately hypercholesterolemic, hypertensive patients randomized to pravastatin vs usual care: The antihypertensive and lipid-lowering treatment to prevent heart attack trial (allhat-llt). *Jama*. 2002;288:2998-3007
8. Athyros VG, Papageorgiou AA, Mercouris BR, Athyrou VV, Symeonidis AN, Basayannis EO, Demitriadis DS, Kontopoulos AG. Treatment with atorvastatin to the national cholesterol educational program goal versus 'usual' care in secondary coronary heart disease prevention. The greek atorvastatin and coronary-heart-disease evaluation (greace) study. *Current medical research and opinion*. 2002;18:220-228
9. Shepherd J, Blauw GJ, Murphy MB, Bollen EL, Buckley BM, Cobbe SM, Ford I, Gaw A, Hyland M, Jukema JW, Kamper AM, Macfarlane PW, Meinders AE, Norrie J, Packard CJ, Perry IJ, Stott DJ, Sweeney BJ, Twomey C, Westendorp RG. Pravastatin in elderly individuals at risk of vascular disease (prosper): A randomised controlled trial. *Lancet (London, England)*. 2002;360:1623-1630
10. Collins R, Armitage J, Parish S, Sleight P, Peto R. Mrc/bhf heart protection study of cholesterol-lowering with simvastatin in 5963 people with diabetes: A randomised placebo-controlled trial. *Lancet (London, England)*. 2003;361:2005-2016
11. Sever PS, Dahlof B, Poulter NR, Wedel H, Beevers G, Caulfield M, Collins R, Kjeldsen SE, Kristinsson A, McInnes GT, Mehlsen J, Nieminen M, O'Brien E, Ostergren J. Prevention of coronary and stroke events with atorvastatin in hypertensive patients who have average or lower-than-average cholesterol concentrations, in the anglo-scandinavian

- cardiac outcomes trial--lipid lowering arm (ascot-lla): A multicentre randomised controlled trial. *Lancet (London, England)*. 2003;361:1149-1158
12. de Lemos JA, Blazing MA, Wiviott SD, Lewis EF, Fox KA, White HD, Rouleau JL, Pedersen TR, Gardner LH, Mukherjee R, Ramsey KE, Palmisano J, Bilheimer DW, Pfeffer MA, Califf RM, Braunwald E. Early intensive vs a delayed conservative simvastatin strategy in patients with acute coronary syndromes: Phase z of the a to z trial. *Jama*. 2004;292:1307-1316
  13. Cannon CP, Braunwald E, McCabe CH, Rader DJ, Rouleau JL, Belder R, Joyal SV, Hill KA, Pfeffer MA, Skene AM. Intensive versus moderate lipid lowering with statins after acute coronary syndromes. *The New England journal of medicine*. 2004;350:1495-1504
  14. Pedersen TR, Faergeman O, Kastelein JJ, Olsson AG, Tikkanen MJ, Holme I, Larsen ML, Bendixen FS, Lindahl C, Szarek M, Tsai J. High-dose atorvastatin vs usual-dose simvastatin for secondary prevention after myocardial infarction: The ideal study: A randomized controlled trial. *Jama*. 2005;294:2437-2445
  15. LaRosa JC, Grundy SM, Waters DD, Shear C, Barter P, Fruchart JC, Gotto AM, Greten H, Kastelein JJ, Shepherd J, Wenger NK. Intensive lipid lowering with atorvastatin in patients with stable coronary disease. *The New England journal of medicine*. 2005;352:1425-1435
  16. Nakamura H, Arakawa K, Itakura H, Kitabatake A, Goto Y, Toyota T, Nakaya N, Nishimoto S, Muranaka M, Yamamoto A, Mizuno K, Ohashi Y. Primary prevention of cardiovascular disease with pravastatin in japan (mega study): A prospective randomised controlled trial. *Lancet (London, England)*. 2006;368:1155-1163
  17. Kjekshus J, Apetrei E, Barrios V, Böhm M, Cleland JGF, Cornel JH, Dunselman P, Fonseca C, Goudev A, Grande P, Gullestad L, Hjalmarsen Å, Hradec J, János A, Kamenský G, Komajda M, Korewicki J, Kuusi T, Mach F, Mareev V, McMurray JJV, Ranjith N, Schaufelberger M, Vanhaecke J, van Veldhuisen DJ, Waagstein F, Wedel H, Wikstrand J. Rosuvastatin in older patients with systolic heart failure. *New England Journal of Medicine*. 2007;357:2248-2261
  18. Tavazzi L, Maggioni AP, Marchioli R, Barlera S, Franzosi MG, Latini R, Lucci D, Nicolosi GL, Porcu M, Tognoni G. Effect of rosuvastatin in patients with chronic heart failure (the gissi-hf trial): A randomised, double-blind, placebo-controlled trial. *Lancet (London, England)*. 2008;372:1231-1239
  19. Ridker PM, Danielson E, Fonseca FA, Genest J, Gotto AM, Jr., Kastelein JJ, Koenig W, Libby P, Lorenzatti AJ, MacFadyen JG, Nordestgaard BG, Shepherd J, Willerson JT, Glynn RJ, Group JS. Rosuvastatin to prevent vascular events in men and women with elevated c-reactive protein. *The New England journal of medicine*. 2008;359:2195-2207
  20. Chan KL, Teo K, Dumesnil JG, Ni A, Tam J. Effect of lipid lowering with rosuvastatin on progression of aortic stenosis: Results of the aortic stenosis progression observation: Measuring effects of rosuvastatin (astronomer) trial. *Circulation*. 2010;121:306-314
  21. Armitage J, Bowman L, Wallendszus K, Bulbulia R, Rahimi K, Haynes R, Parish S, Peto R, Collins R. Intensive lowering of ldl cholesterol with 80 mg versus 20 mg simvastatin daily in 12,064 survivors of myocardial infarction: A double-blind randomised trial. *Lancet (London, England)*. 2010;376:1658-1669
  22. Bays H, Gaudet D, Weiss R, Ruiz JL, Watts GF, Gouni-Berthold I, Robinson J, Zhao J, Hanotin C, Donahue S. Alirocumab as add-on to atorvastatin versus other lipid treatment

- strategies: Odyssey options i randomized trial. *The Journal of clinical endocrinology and metabolism*. 2015;100:3140-3148
23. Kastelein JJ, Ginsberg HN, Langslet G, Hovingh GK, Ceska R, Dufour R, Blom D, Civeira F, Krempf M, Lorenzato C, Zhao J, Pordy R, Baccara-Dinet MT, Gipe DA, Geiger MJ, Farnier M. Odyssey fh i and fh ii: 78 week results with alirocumab treatment in 735 patients with heterozygous familial hypercholesterolaemia. *European heart journal*. 2015;36:2996-3003
  24. Robinson JG, Farnier M, Krempf M, Bergeron J, Luc G, Averna M, Stroes ES, Langslet G, Raal FJ, El Shahawy M, Koren MJ, Lepor NE, Lorenzato C, Pordy R, Chaudhari U, Kastelein JJ. Efficacy and safety of alirocumab in reducing lipids and cardiovascular events. *The New England journal of medicine*. 2015;372:1489-1499
  25. Sabatine MS, Giugliano RP, Wiviott SD, Raal FJ, Blom DJ, Robinson J, Ballantyne CM, Somaratne R, Legg J, Wasserman SM, Scott R, Koren MJ, Stein EA. Efficacy and safety of evolocumab in reducing lipids and cardiovascular events. *The New England journal of medicine*. 2015;372:1500-1509
  26. Nicholls SJ, Puri R, Anderson T, Ballantyne CM, Cho L, Kastelein JJ, Koenig W, Somaratne R, Kassahun H, Yang J, Wasserman SM, Scott R, Ungi I, Podolec J, Ophuis AO, Cornel JH, Borgman M, Brennan DM, Nissen SE. Effect of evolocumab on progression of coronary disease in statin-treated patients: The glagov randomized clinical trial. *Jama*. 2016;316:2373-2384
  27. Roth EM, Moriarty PM, Bergeron J, Langslet G, Manvelian G, Zhao J, Baccara-Dinet MT, Rader DJ. A phase iii randomized trial evaluating alirocumab 300 mg every 4 weeks as monotherapy or add-on to statin: Odyssey choice i. *Atherosclerosis*. 2016;254:254-262
  28. Teramoto T, Kobayashi M, Tasaki H, Yagyu H, Higashikata T, Takagi Y, Uno K, Baccara-Dinet MT, Nohara A. Efficacy and safety of alirocumab in japanese patients with heterozygous familial hypercholesterolemia or at high cardiovascular risk with hypercholesterolemia not adequately controlled with statins- odyssey japan randomized controlled trial. *Circulation journal : official journal of the Japanese Circulation Society*. 2016;80:1980-1987
  29. Kiyosue A, Honarpour N, Kurtz C, Xue A, Wasserman SM, Hirayama A. A phase 3 study of evolocumab (amg 145) in statin-treated japanese patients at high cardiovascular risk. *The American journal of cardiology*. 2016;117:40-47
  30. Farnier M, Jones P, Severance R, Averna M, Steinhagen-Thiessen E, Colhoun HM, Du Y, Hanotin C, Donahue S. Efficacy and safety of adding alirocumab to rosuvastatin versus adding ezetimibe or doubling the rosuvastatin dose in high cardiovascular-risk patients: The odyssey options ii randomized trial. *Atherosclerosis*. 2016;244:138-146
  31. Sabatine MS, Giugliano RP, Keech AC, Honarpour N, Wiviott SD, Murphy SA, Kuder JF, Wang H, Liu T, Wasserman SM, Sever PS, Pedersen TR. Evolocumab and clinical outcomes in patients with cardiovascular disease. *The New England journal of medicine*. 2017;376:1713-1722
  32. Schwartz GG, Steg PG, Szarek M, Bhatt DL, Bittner VA, Diaz R, Edelberg JM, Goodman SG, Hanotin C, Harrington RA, Jukema JW, Lecorps G, Mahaffey KW, Moryusef A, Pordy R, Quintero K, Roe MT, Sasiela WJ, Tamby JF, Tricoci P, White HD, Zeiher AM. Alirocumab and cardiovascular outcomes after acute coronary syndrome. *The New England journal of medicine*. 2018;379:2097-2107
